# Supplementary material
Source: publisher figshare collection journal article supplement (https://springernature.figshare.com/ndownloader/files/17990684)
Supplement: Supplementary file 1 [file 17990684]

# Additional file 2

| **Search query** | **Additional inclusion criteria (not included in search query)** | **Additional exclusion criteria (not included in search query)** |
| --- | --- | --- |
| ( ( ( ( ( title-abs-key ( "contaminant*" or "substance" or "compound*" or "chemical*" or "pathogen" or "micro organism" or "microorganism" or "infectious disease" or "virus" or "viri" or "bacter*" or "protoz*" or "component" or "agent" or "metabolite" or "transformation products" or "pollutant*" or "nanoparticle*" ) ) and ( title-abs-key ( "analys*" or "detect*" or "determinat*" or "monitor*" or "occur*" or "screen*" or "surveill*" or "test*" or "sensor*" or "report*" or "prevalence" or "identif*" ) ) and ( ( title-abs-key ( "recent" or "novel" or "late*" or "new" or "emerging" or "first" ) ) ) and ( title-abs-key ( "effluent*" or "surface water" or "surfacewater" or "river*" or "lake*" or "storm water" or "stormwater" or "stream*" or "process water" or "processwater" or "treated water" or "treatedwater" or "tap water" or "tapwater" or "drinking water" or "drinkingwater" or "potable water" or "potablewater" or "ground water" or "groundwater" or "fresh water" or "freshwater" or "river*" or "aquatic environment" or "aquifer*" or "sewage*" or "waste water" or "wastewater" or "rain*" or "water borne" or "waterborne" or "catchment" or "water related" or "waterrelated" and not "rainforest" ) ) ) ) ) ) AND ( EXCLUDE ( SUBJAREA , "BUSI " ) OR EXCLUDE ( SUBJAREA , " PSYC " ) OR EXCLUDE ( SUBJAREA , " ECON " ) OR EXCLUDE ( SUBJAREA , " DENT " ) OR EXCLUDE ( SUBJAREA , " CENG " ) ) AND ( LIMIT-TO ( DOCTYPE , "ar " ) OR LIMIT-TO ( DOCTYPE , " re " ) OR LIMIT-TO ( DOCTYPE , " ip " ) ) AND ( LIMIT-TO ( PUBYEAR , 2012 ) OR LIMIT-TO ( PUBYEAR , 2008 ) OR LIMIT-TO ( PUBYEAR , 2009 ) OR LIMIT-TO ( PUBYEAR , 2006 ) OR LIMIT-TO ( PUBYEAR , 2010 ) OR LIMIT-TO ( PUBYEAR , 2011 ) ) AND ( LIMIT-TO ( LANGUAGE , "English " ) ) | - Studies about new detections in aquatic plants and biota - Studies reporting the first identification of contaminants created during treatment, e.g. newly identified disinfection by-products | - Studies about new analytical techniques - Studies about new bio indicators - Studies about new toxicity results for known contaminants - Studies about new detections in soil - Studies about new removal techniques for known contaminants - Studies reporting first detections in plants - Articles about drinking water- or wastewater treatment techniques were excluded |
